# Supplementary material
Source: publisher figshare collection journal article supplement (https://frontiersin.figshare.com/ndownloader/files/31477694)
Supplement: Supplementary file 1 [file 31477694]

**Table 6.** Fibre quality traits, averaged over locations, as affected by the various nutrient management practices

|  | 2018-19 | | | | 2019-20 | | | |
| --- | --- | --- | --- | --- | --- | --- | --- | --- |
| Treatments | Fibre length (mm) | Uniformity (%) | Micronaire | Fibre strength (g/tex) | Fibre length (mm) | Uniformity (%) | Micronaire | Fibre strength (g/tex) |
| FP | 28.2 | 82.2 | 3.8 | 29.8 | 27.7 | 81.6 | 3.8 | 29.9 |
| RDF | 28.8 | 82.3 | 4.0 | 29.4 | 27.8 | 81.7 | 3.8 | 28.9 |
| STCR | 28.6 | 82.3 | 3.9 | 29.6 | 27.3 | 81.4 | 3.9 | 27.8 |
| NE | 28.5 | 82.0 | 4.0 | 31.6 | 27.4 | 81.4 | 4.0 | 29.1 |
| LSD0.05 | NS | NS | NS | NS | NS | NS | NS | NS |
